# Supplementary material for: Enhancement of lipid peroxidation and its amelioration by vitamin E in a subject with mutations in the SBP2 gene
Source: PubMed Central journal article supplement (PMC4617404; doi:10.1194/jlr.m059105), 2015-11
Supplement: 10.1194_M059105_jlr.M059105-1.pdf [file 10.1194_M059105_jlr.M059105-1.pdf]

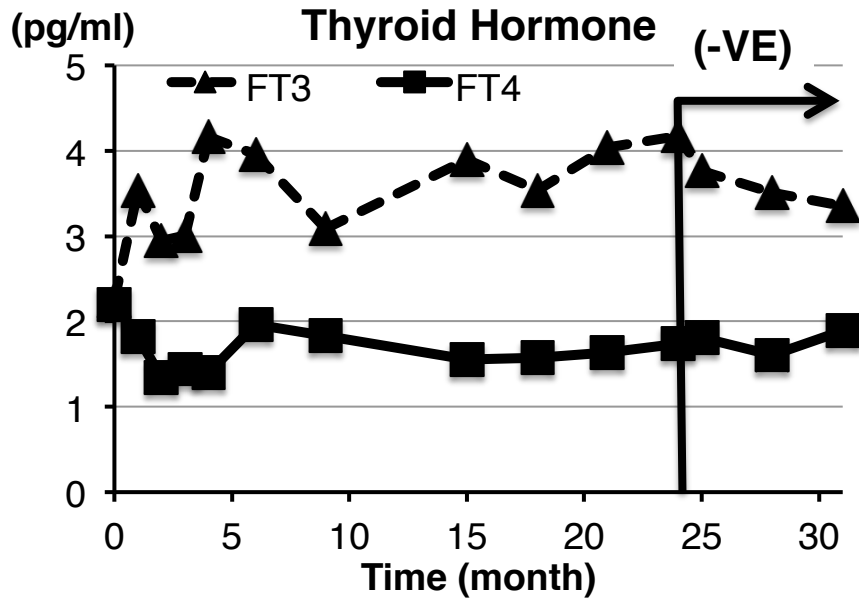

**Supplemental Figure S1.** The levels of thyroid hormone in the serum of the *SBP2* mutant over the course of the study. The administration of T<sub>3</sub> was simultaneously started with vitamin E treatment, and continued until the end of the study (2 years and 7 months). During this time, the levels of free T<sub>3</sub> (FT<sub>3</sub>) and free T<sub>4</sub> (FT<sub>4</sub>) were determined and plotted against time.
